# Supplementary material for: A symmetric geometry of transmembrane domains inside the B cell antigen receptor complex
Source: PubMed Central journal article supplement — Proc Natl Acad Sci U S A. 2019 Jun 17;116(27):13468–73. doi: 10.1073/pnas.1907481116 (PMC6613136; doi:10.1073/pnas.1907481116), 2019-06-17
Supplement: pnas.1907481116.sapp.pdf [file pnas.1907481116.sapp.pdf]

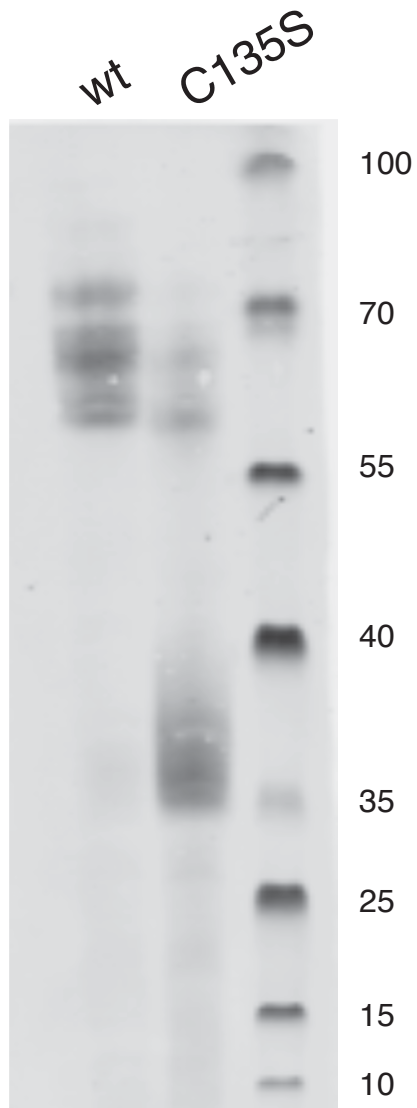

**Fig. S1. Cysteine 135 is responsible for Ig $\beta$  homodimer formation.** Western blot analysis for Ig $\beta$ /Ig $\beta$  homodimer formation of S2 cells expressing the Ig $\beta$  wt or Ig $\beta$ -C135S mutant. Proteins are separated by non-reducing SDS-PAGE and blotted against anti-HA antibody.

A

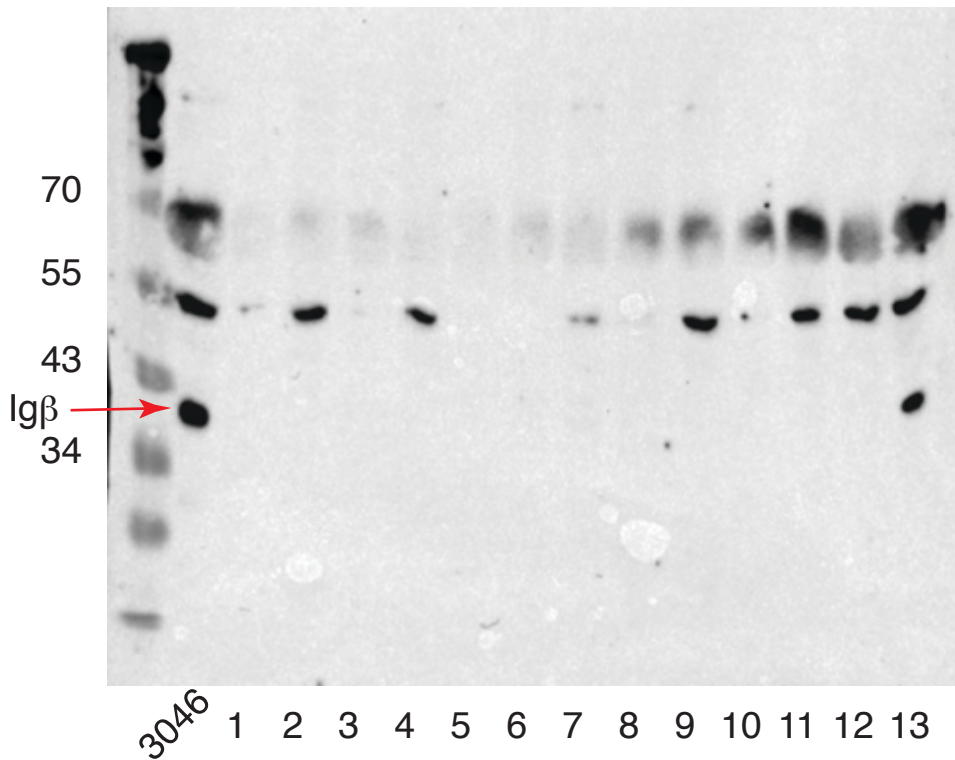

B

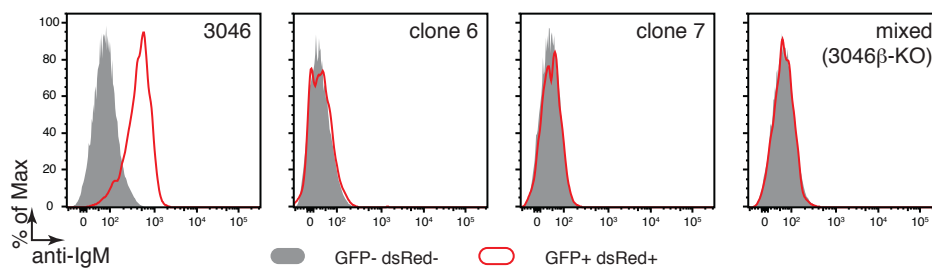

**Fig. S2. Knock out  $Ig\beta$  in 3046 pro-B cells by CRISPR/Cas9.** (A) Western blot analysis for  $Ig\beta$  expression of the indicated 3046 cells clones after CRISPR/Cas9. Proteins are separated by SDS-PAGE and blotted against anti- $Ig\beta$ . (B) Flow cytometry analysis for BCR surface expression in the indicated 3046 pro-B cells expressing HC, LC and  $Ig\alpha$ . cells were stained by anti-IgM. Gray, untransfected cells; red, transfected cells.

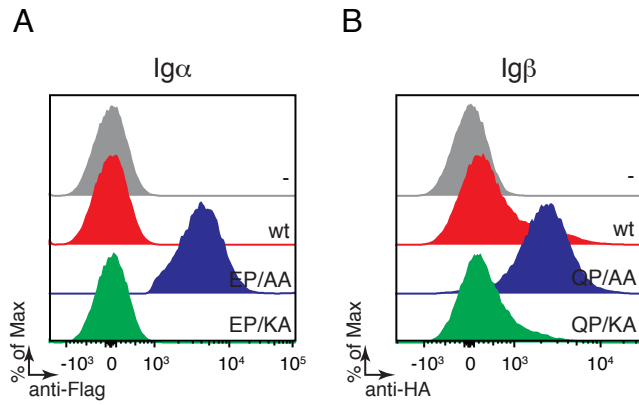

**Fig. S3. The E/Q-X10-P motif is responsible for the ER retention of both Ig $\alpha$  and Ig $\beta$  in 3046 $\beta$ -KO cells.** (A) Flow cytometry analysis of the expression of Flag-tagged Ig $\alpha$  on the surface of 3046 $\beta$ -KO cells transfected with plasmids encoding the indicated wt and mutant forms of Ig $\alpha$ . (B) Flow cytometry analysis of the expression of HA-tagged Ig $\beta$  on the surface of 3046 $\beta$ -KO cells transfected with plasmids encoding the indicated wt and mutant forms of Ig $\beta$ . Data are representative of three independent experiments.
